# Supplementary material
Source: PubMed Central journal article supplement (PMC8410944)

**Supplementary information, Fig. S2. Safety evaluation of I-P-F in mice. (a-c)** BALB/c mice (n = 6) were intramuscularly immunized with 10  $\mu$ g, 50  $\mu$ g or 100 $\mu$ g of I-R-F and the body weight, serum cytokines and biochemical indexes were determined. **(a)** Body weight changes were monitored and analyzed. **(b)** Serum inflammatory cytokines were determined by Cytometric Beads Array (CBA). **(c)** ALT and AST levels were analyzed by an automatic biochemical analyzer. The dotted lines indicate the upper limit of the normal range of ALT or AST using mean  $\pm$  2 $\times$ SD of PBS group. **(d)** Evaluation of the IFN $\alpha$  specific antibody levels by ELISA. BALB/c Mice (n = 6/group) were intramuscularly vaccinated with 10  $\mu$ g of I-R-F or equimolar RBD protein and boosted with the same dose at a 14-day interval. PBS was performed as a negative control. Sera were collected on day 28 after the initial immunization and subjected to determine the anti-murine IFN $\alpha$  level. The dashed line indicates the limit of detection. Data are shown as mean  $\pm$  SEM. *P*-values were calculated by one-way ANOVA with multiple comparison tests. ns (not significant), \**P* < 0.05, \*\**P* < 0.01, \*\*\**P* < 0.001, \*\*\*\**P* < 0.0001.

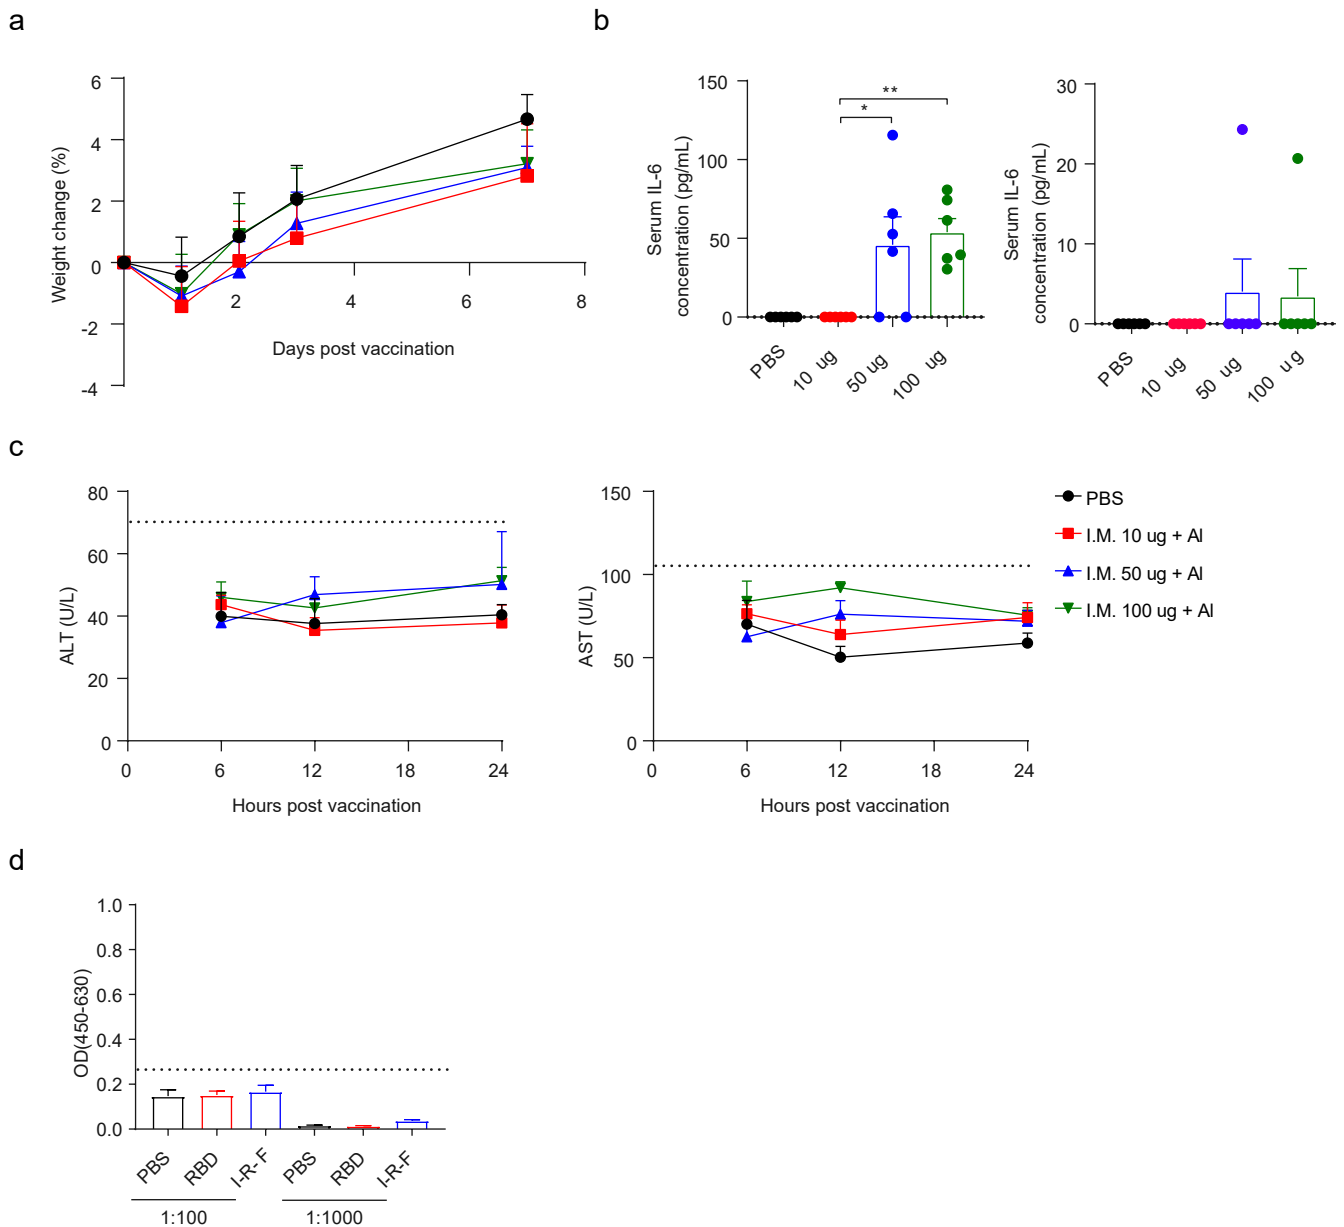

Supplement: 41422_2021_531_MOESM2_ESM.pdf [file 41422_2021_531_MOESM2_ESM.pdf]
