# Supplementary material
Source: PubMed Central journal article supplement (PMC8410944)

**Supplementary information, Fig. S3. B and T cells immune response related to Figure 3. (a)** Gating strategy for evaluating RBD-specific memory B cells in the spleen related to Fig. 3c was present. **(b-d)** The raw data for B cell ELISPOT, IFN $\gamma$ , and IL-4 ELISPOT related to Fig. 3b, 3d and 3e were present. The representative flow cytometric contour plots related to Fig. 3f, and Fig. 3g were shown in **(e)** and **(f)**.

**a**

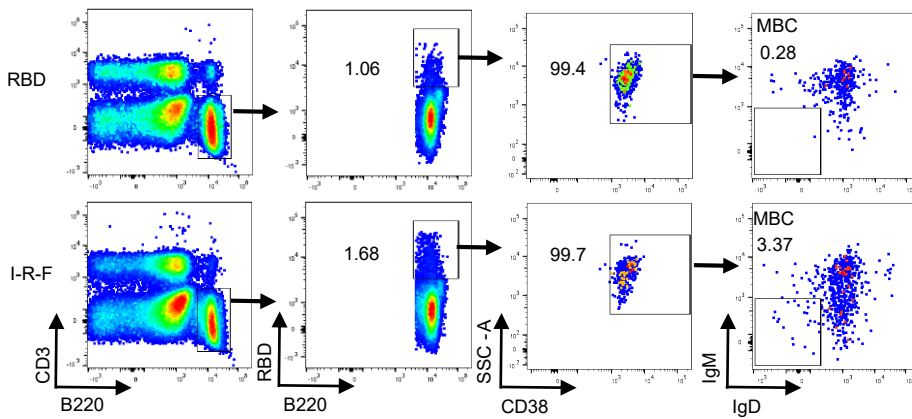

**b**

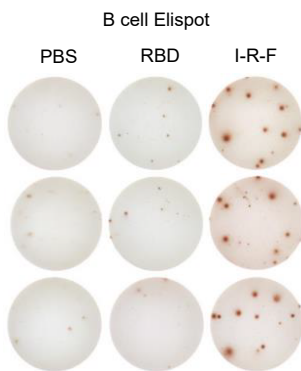

**c**

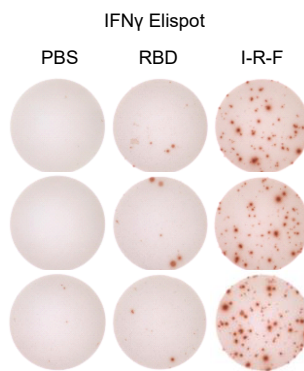

**d**

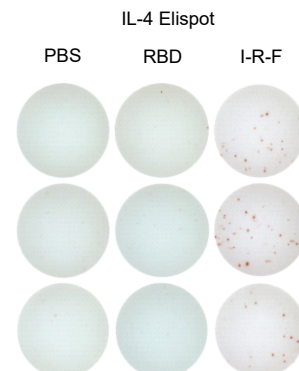

**e**

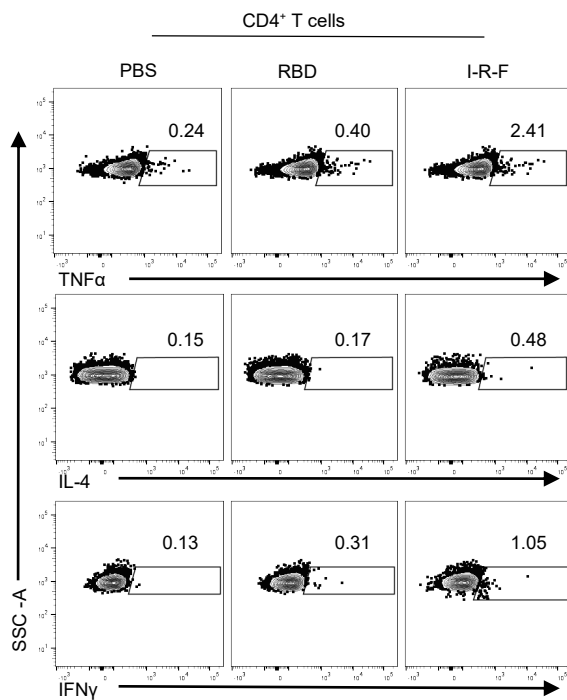

**f**

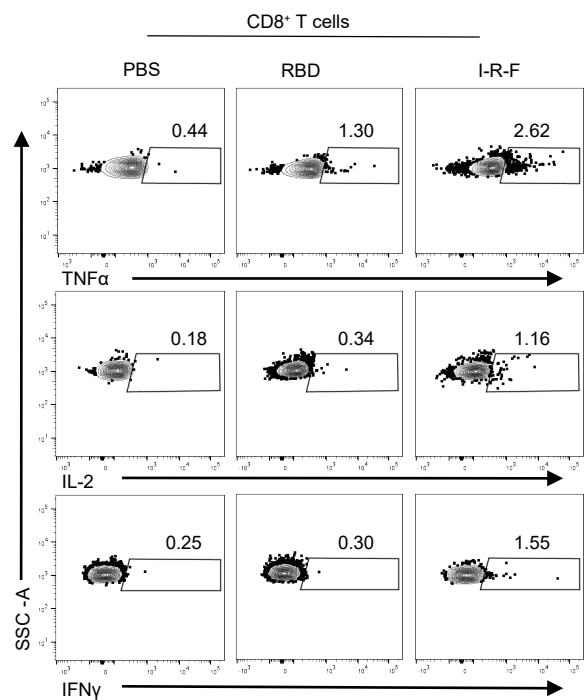

Supplement: 41422_2021_531_MOESM3_ESM.pdf [file 41422_2021_531_MOESM3_ESM.pdf]
