# Supplementary material
Source: PubMed Central journal article supplement (PMC8410944)

**Supplementary information, Fig. S4. Potent antigen presentation, Tfh, and GC generation. (a and b)** C57BL/6 mice (n=7 or 8/group) were intramuscularly injected 1 nmole of I-E-F (mouse IFN $\alpha$ -eGFP-Fc) or eGFP. Four hours after injection, mice were sacrificed. Lymphocytes from mouse iLNs were collected to analyze the capture of I-E-F or eGFP. Flow cytometry analysis was proceeded to determine the percentages of GFP-positive macrophages (B220 $^{-}$ CD11b $^{+}$ F4/80 $^{+}$ ). The results of GFP-positive macrophages **(a)** and the representative flow cytometric contour plots **(b)** were present. The representative flow cytometric histograms related to Fig. 4e is shown in **(c)**. **(d-f)** Representative gating strategy for evaluating RBD-specific GC B cells, Tfh cells, and OX40 $^{+}$ CD25 $^{+}$  Tfh cells related to Fig. 4f-j.

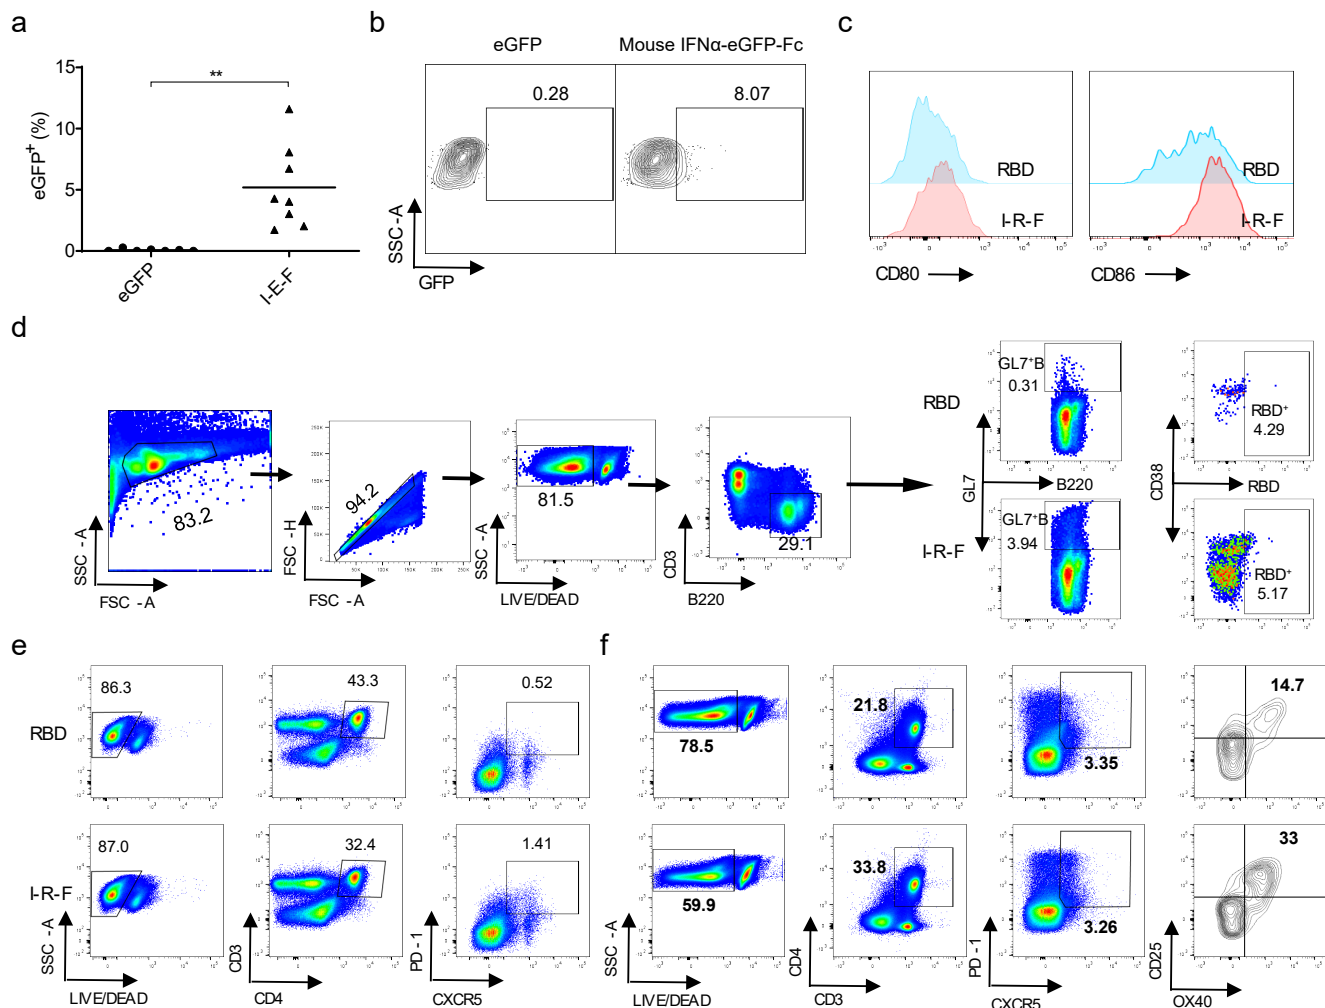

Supplement: 41422_2021_531_MOESM4_ESM.pdf [file 41422_2021_531_MOESM4_ESM.pdf]
